# Supplementary material
Source: Springer Nature journal article supplement (https://www.springermedizin.de/resource/supplementary/12891_2010_906_MOESM1_ESM.pdf/9506676)
Supplement: MOESM1 [file 9506676]

411 Hospitals were approached for the study  
100%

6 hospitals were ineligible  
3 hospitals merged  
3 hospitals closed

405 hospitals were surveyed  
98.5 %

110 hospitals did not complete the survey (27 %)  
29 hospitals refused  
81 hospitals did not respond

295 hospitals responded  
(73%)

204 hospitals with pathways  
7,440 Patients

91 hospitals without pathways  
1,717 Patients
